## SOCIOCULTURAL CONTEXT AND INNOVATION SCALE UP

### 27 **Abstract**

28 **Objectives** To explore how sociocultural factors may support or impede the adoption of  
29 community-based distribution of injectable contraceptives in Nigeria.

30 **Design** A qualitative study based on a grounded theory approach was conducted through in-  
31 depth interviews and focus group discussions.

32 **Setting** Most participants lived in Gombe State, North East Nigeria. Other participants were  
33 from Ibadan (South West) and Abuja (Federal capital territory).

34 **Participants** Through seven key informant interviews, 15 in-depth interviews and 10 focus  
35 group discussions, 102 participants were involved in the study.

36 **Methods** This study, conducted in 2016 was part of a larger study on scale up of community-  
37 based distribution of injectable contraceptives. Qualitative data were collected from  
38 traditional and religious leaders, health workers and community members. The data were  
39 audio recorded, transcribed and analysed using a thematic framework method.

40 **Results** Sociocultural challenges to scale up included patriarchy and men's fear of losing  
41 control over their spouses, traditional and religious beliefs about fertility, and myths about  
42 contraceptives and family planning. As a result of deep-rooted beliefs that children are  
43 'divine blessings' and that procreation should not be regulated, participants described a subtle  
44 resistance to uptake of injectable contraceptives. Since Gombe is largely a patriarchal society,  
45 male involvement emerged as important to the success of meaningful innovation uptake.  
46 Community leaders largely described their participation in the scale up process as active,  
47 although they also identified scope for further involvement and recognition.

48 **Conclusion** Scale up is more than setting up health sector implementing structures, training  
49 health workers and getting innovation supplies, but also requires preparedness which includes  
50 paying attention to complex contextual issues. This requires the health system and those who  
51 work in it, to move beyond a narrow health 'comfort zone' by actively engaging with, and  
52 learning from, those who are leading, caring for and living in, the community.

53

### 54 **Strengths and limitations of this study**

- 55 • The study participants represented a range of stakeholders - users of injectable

## SOCIOCULTURAL CONTEXT AND INNOVATION SCALE UP

- 56           contraceptives, community members, providers and health system managers.
- 57           • Our results highlighted that scale up is influenced by several socio-cultural factors;
- 58           thus, showing the importance of paying attention to complex contextual issues during
- 59           innovation uptake.
- 60           • The findings of our study emphasized how health systems and communities should
- 61           interact in order to ensure successful scale up of health innovations.
- 62           • As with any qualitative study, the findings of this study are not statistically
- 63           generalizable.

64

65   **Keywords:** Nigeria; Scale up; Community-based distribution of injectable contraceptives;

66   Community participation; Male involvement; Stakeholder collaboration; Sociocultural

67   context

68

### 69   **Funding**

70   This research was supported by the Consortium for Advanced Research Training in Africa

71   (CARTA). CARTA is jointly led by the African Population and Health Research Center and the

72   University of the Witwatersrand and funded by the Carnegie Corporation of New York (Grant

73   No--B 8606.R02), Sida (Grant No:54100113), the DELTAS Africa Initiative (Grant No:

74   107768/Z/15/Z) and Deutscher Akademischer Austauschdienst (DAAD). The DELTAS Africa

75   Initiative is an independent funding scheme of the African Academy of Sciences (AAS)'s Alliance

76   for Accelerating Excellence in Science in Africa (AESA) and supported by the New Partnership

77   for Africa's Development Planning and Coordinating Agency (NEPAD Agency) with funding from

78   the Wellcome Trust (UK) and the UK government. The statements made and views expressed are

79   solely the responsibility of the authors.

### 80   **Declarations of interest**

81   None.

82

83

## SOCIOCULTURAL CONTEXT AND INNOVATION SCALE UP

### 84 **1. Introduction**

85 Scale up of effective health innovations, through their increased availability to a larger  
86 population over a wider geographic area, is essential for achieving universal health coverage,  
87 particularly in developing countries.<sup>1 2</sup> Scale up is influenced by various factors related to the  
88 innovation, the users, and the social context in which the innovation is introduced.<sup>3</sup> The  
89 nature of the innovation itself, preferences and characteristics of the intended users (including  
90 their willingness to adopt the innovation), and ways that the innovation is adapted to the local  
91 context are also some of the factors affecting innovation scale up.<sup>4</sup>

92 The sociocultural context, which includes religious and cultural beliefs, gender and societal  
93 norms and attitudes, is an important predictor of adoption of a health innovation in a  
94 population.<sup>5 6</sup> The sociocultural context may promote health or be a barrier to health  
95 utilization.<sup>7</sup> For example, cultural beliefs and practices have been shown to influence the  
96 uptake of a range of health innovations including male circumcision,<sup>8</sup> breast cancer  
97 screening<sup>7 9</sup> and contraceptives.<sup>10 11</sup> Without due consideration of the sociocultural context,  
98 health innovation development, delivery and scale up is likely to be limited, if not  
99 dangerous!<sup>12</sup>

100 Evidence highlights the influence of sociocultural context on the adoption of contraceptive  
101 innovations. For example, in a study in rural Poland, Colleran and Mace<sup>13</sup> reported that  
102 religious and sociocultural factors, particularly social networks, influence the uptake of  
103 contraceptive use more than individual characteristics. Dalaba and colleagues<sup>14</sup> in their study  
104 in northern Ghana reported that inadequate male participation led to resistance towards  
105 female reproductive freedom. Interventions at societal level, such as adequate male  
106 mobilisation coupled with appropriate community-based distribution strategies were shown  
107 to be effective in improving contraceptive uptake.<sup>14</sup> In Nigeria, where society is largely  
108 patriarchal, with consequences for access to and use of contraceptives, a study found that  
109 about two-thirds of rural women who had spousal approval were reported to use  
110 contraceptives while all those who were forbidden by their husbands did not use any family  
111 planning method.<sup>15</sup> Understanding whether and how the sociocultural context influences  
112 scale up of contraceptive innovation is thus important.

113 Nigeria started its family planning policy review in 2007 and successfully piloted the  
114 community-based distribution of injectable contraceptives through community health  
115 extension workers (CHEWs) as a new innovation in the health system in 2010 in Gombe

## SOCIOCULTURAL CONTEXT AND INNOVATION SCALE UP

116 State, North-eastern region.<sup>16 17</sup> Afterwards, the scale up of this innovation started in 2014,  
117 led by a national non-governmental organization and supported by international donor  
118 agencies.<sup>18</sup>

119 According to Bradley *et al.*,<sup>3</sup> assessing the receptivity and willingness of community members  
120 to adopt a health innovation within their environmental and sociocultural settings is one of  
121 the key first steps in the scale up process. In their conception, poor understanding by  
122 implementers of potential users' sociocultural context will limit scale up efforts, while good  
123 understanding will help program managers to recognise contextual factors that may enhance  
124 or inhibit the uptake of an innovation.<sup>3</sup> However, the understanding of how sociocultural  
125 contextual factors may facilitate or impede the successful scale up of the contraceptive  
126 innovation beyond the initial pilot site in Nigeria is limited. This study therefore assesses how  
127 sociocultural factors may influence the scale up of the community-based distribution of  
128 injectable contraceptives in Nigeria.

## 129 **2. Methods**

### 130 *2.1 Study design and setting*

131 This cross-sectional study conducted from September to November 2016, part of a larger  
132 research project on scale up of community-based distribution of injectable contraceptives,  
133 took place in Gombe (North eastern Nigeria), one of 36 States in Nigeria. Gombe State, with  
134 a population of 2,353,879 people according to the 2006 population census,<sup>19</sup> has one of the  
135 lowest contraceptive prevalence rates in the country (3.5% for modern methods and 4.0% for  
136 any method) and one of the highest maternal mortality rates (1,726/100,000).<sup>16 20 21</sup> Gombe  
137 was purposively selected because it was the setting for the national pilot test for community-  
138 based distribution of injectable contraceptives in 2010. Gombe is divided administratively  
139 into 11 Local Government Areas (LGAs). The study held in two LGAs – Gombe (A) and  
140 Yamaltu/Deba (B). Although participants were primarily based in Gombe State, one  
141 interview took place in Ibadan (South west) and 3 interviews in Abuja (Federal Capital  
142 Territory).

### 143 *Participants and sample*

144 Qualitative data were collected from a range of stakeholders, including traditional and  
145 religious leaders, health workers as well as community members, through seven key  
146 informant interviews, 15 in-depth interviews and 10 focus group discussions (see Table 1). In

## SOCIOCULTURAL CONTEXT AND INNOVATION SCALE UP

147 total, 102 people participated in this study. The participants were selected through a  
148 purposive sampling method, where study respondents are recruited based on characteristics of  
149 interest, availability, and ability to provide relevant information to the research question.<sup>22 23</sup>  
150 how may sociocultural context influence the process of introducing, translating and  
151 integrating health innovation? The number of interviews and FGDs was determined by the  
152 principle of saturation in qualitative study, a point where no new data is being gotten.<sup>24</sup>  
153 This study adopted the grounded theory approach using inductive reasoning. This approach is  
154 appropriate for this study since it is exploratory in nature and principles are being derived  
155 from specific observations.<sup>24 25</sup> Of the three authors, two are women, two are physician-  
156 researchers and two are domiciled in Africa.

157

158 **[Table 1]**

159

### 160 ***2.2 Data collection***

161 Interview guide and focus group guide were used to conduct the interviews and focus group  
162 discussions, respectively (see Supplementary file 1). The interview guides for the discussions  
163 with community members and interview with traditional leaders were translated to the  
164 predominant local language - Hausa. The main issues covered in the interview and  
165 discussions included community perceptions about contraceptives and specifically about the  
166 innovation (community-based delivery of contraceptives), their role in the scale up process,  
167 as well as their views regarding the sociocultural challenges and facilitators of the scale up  
168 process and community engagement regarding the scale up. Interviews and discussions were  
169 tape-recorded and later translated and transcribed in full.

### 170 ***2.3 Data analysis***

171 Transcripts were analyzed iteratively with the aid of the NVIVO (version 10) software using  
172 the thematic framework approach.<sup>24 25</sup> The pre-defined thematic areas included features of the  
173 sociocultural context that may influence scale up of the innovation. These were: community  
174 members' perceptions regarding community-based distribution of injectable contraceptives,  
175 community members' acceptance (or rejection) of contraceptives, and community  
176 engagement in the scale up process. Emerging themes were also considered and were indexed

## SOCIOCULTURAL CONTEXT AND INNOVATION SCALE UP

177 and compared with themes from subsequent interviews until saturation was attained.  
178 Interviews were stopped at the point of saturation, where no new information was obtained.<sup>24</sup>  
179 The authors reviewed the transcripts and compared themes, before these were applied to  
180 subsequent coding of all the transcripts. The SRQR reporting guidelines for qualitative  
181 studies<sup>26</sup> was used in preparing this manuscript.

### 182 ***2.4 Ethics approval and consent to participate***

183 Ethical approval for this study was obtained from the University of Ibadan/University  
184 College Hospital Ethical Review Board (Reference No.: UI/EC/16/0022) as well as the  
185 Human Research Ethics Committee (Medical) of the University of the Witwatersrand  
186 (Reference No.: M160737). Written informed consent were obtained from study participants  
187 before the interviews and FGDs (see Supplementary file 2). Participants were also assured of  
188 confidentiality by ensuring that all identifiers were removed from the data and that only the  
189 research team has access to the data.

190

## 191 **3. Results**

192 Respondents described a number of sociocultural factors that challenge the scale up process  
193 encountered right from the pilot stage (see Figure 1).

194

### 195 **[Figure 1]**

196

197

### 198 ***3.1 Deep rooted cultural and religious beliefs about fertility***

199 Participants spoke about a deep-rooted belief amongst community members that children are  
200 ‘divine blessings’ and that procreation should not be regulated. Emerging from this world  
201 view, participants described a subtle resistance to the uptake of injectable contraceptives,  
202 more passive than overt in its expression by individuals and families who would feign  
203 acceptance but refuse the intervention when given.

204 “...there will always be resistance to this use of contraceptives, because here, we are

## SOCIOCULTURAL CONTEXT AND INNOVATION SCALE UP

205 *people that believe that children are a blessing, so you give birth to as many as*  
206 *possible. ...The resistance may not be as a group, but when you come to individual*  
207 *levels... as a government, they might not show you the resistance, but when it comes*  
208 *to the actual usage, that's where you start having problems.” (IDI, male, Doctor,*  
209 *SMoH)*

210 Also, there were issues about religious beliefs influencing perception about family planning/  
211 contraceptive use at the community level. Religiosity, that is, strong adherence to religious  
212 beliefs, was said to be one of the major factors impeding the uptake of contraceptives in  
213 general.

214 *“...when you look at northern Nigeria, majority are Muslims and when you look at*  
215 *the south eastern states, you know we have issue of religion, issue of uptake of all*  
216 *contraceptives, not even injectables alone. To the south eastern man, most of them are*  
217 *Catholics, they frown at family planning, so also here (northern Nigeria) people*  
218 *frown at family planning in general” (KII, male, Senior official, SMoH).*

### 219 **3.2 Awareness and perceptions regarding family planning**

220 Most interview respondents agreed that there was a need to continue to educate community  
221 members about the overall benefits of contraceptives and family planning as well as  
222 emphasize possible side effects of contraceptives use among women. Also, informants were  
223 of the opinion that lack of knowledge about benefits of contraception contributes to  
224 reluctance to adopt the innovation. In the words of a respondent:

225 *“...the community and people at the grassroots have little information (on*  
226 *contraceptives)” (KII, female, Senior official, SMoH).*

227 These challenges were further compounded by reports of adverse effects of the contraception  
228 from some women especially *“severe bleeding during menstruation”* (IDI, female, CHEW).  
229 Healthcare providers felt that to effectively deal with these challenges, it was important to  
230 listen sympathetically to the women and treat reported side effects, in line with the training  
231 received for the innovation scale up. Education was also given when clients had questions in  
232 order to resolve doubts about the innovation. For example, a respondent said:

233 *“We listen to them, and we explain to them that since it (contraceptive) is a new thing in the body,*

234 Focus group discussants highlighted many reasons why women in their reproductive age



## SOCIOCULTURAL CONTEXT AND INNOVATION SCALE UP

235 group used injectable contraceptives, including desire to stay attractive in order to prevent  
236 husbands from ‘straying’, space the children and enjoy life with fewer financial and parenting  
237 constraints. One of the discussants who currently uses injectable contraceptives described her  
238 motivation thus:

239 *“...If we space our children well, we will enjoy our lives because our husbands will*  
240 *always desire us since we are always looking attractive. He will not stay out late*  
241 *because he will be thinking of you at home”* (FGD, female, current user).

242 Also, a participant stated that the impetus for contraceptive use was the fact that spacing her  
243 children afforded her the ability to take care of herself and the home thereby promoting  
244 hygiene and healthy living in the home. She said:

245 *“...You will be able to take care of yourself as well as your house, your husband will*  
246 *also desire you as you will look good as well as your children. Flies will not follow*  
247 *you around and anyone that comes to your house will be able to eat and drink*  
248 *because everywhere is clean and attractive”* (FGD, female, current user).

### 249 ***3.3 Perceptions regarding the community-based distribution (CBD) approach***

250 Many of the women who were current users of injectable contraceptives stated their  
251 preference for the community-based approach over the facility-based system of distributing  
252 the contraceptives. Some of their reasons for this position included convenience, affordability  
253 (saves cost as transport fare is not needed), improved privacy and focused attention from the  
254 health worker.

255 *“...During home visit, it’s between you and the woman (health worker) and she can*  
256 *explain it very well to you since she is not in a hurry; although in the hospital they*  
257 *can also explain but the home visit is better since the health worker will explain until*  
258 *you understand.”* (FGD, female, current user).

259 Likewise, some male discussants preferred the community-based approach because they  
260 believed it was more confidential and gave women more time to deal with domestic issues.  
261 The CBD approach was also believed to align with men’s desire to be in control of ‘family  
262 issues’.

263 *“...Maybe the time the wife wants to go (to the health facility) the husband needed her*  
264 *for something else...Sometimes some husbands want all these things to be*

## SOCIOCULTURAL CONTEXT AND INNOVATION SCALE UP

265 *confidential, but when you now tell them to release their wives to the hospital, they*  
266 *will think you are exposing the family issues” (FGD, married men).*

267 However, one of the discussants who favoured the facility-based approach *‘prefer[ed] to go*  
268 *to the hospital, so I can be checked properly, including to check my BP”* (FGD, female,  
269 current user). Similarly, some married men also preferred the facility-based approach as they  
270 believed that the community-based method is intrusive of their privacy and undermines their  
271 authority:

272 *“...My advice is that the woman should come to hospital ...because some husbands*  
273 *will query you that who gave you the permission to see their wives (at home) and*  
274 *advise them about child spacing. Some disagree with the community-based method”*  
275 *(FGD, married men).*

### 276 **3.4 Spousal involvement in family planning**

277 In addition, male involvement was highlighted as important if uptake of innovation will be  
278 meaningful since Gombe is largely a society where the women need the men’s permission for  
279 doing many things including obtaining injectable contraceptives.

280 *“Some men will not accept it (contraceptive) because they want plenty children...she*  
281 *(the wife) should continue begging the husband until he agrees if she wants to use*  
282 *contraceptives”* (FGD, women not using contraceptives).

283 Furthermore, cultural beliefs and sociocultural context were reported as fuelling poor  
284 awareness and knowledge about contraceptive use. Also, male involvement was described as  
285 important in dealing with the problem of ignorance and poor perception about family  
286 planning in the community. According to the participants in this study, once the men are well  
287 informed, it is easier to get their buy-in and cooperation in permitting their wives to get the  
288 injections.

289 *“...some of the men don’t know much about family planning commodities and some*  
290 *(people) are telling them some of the side effects. So, they prevent the women from*  
291 *using them...that’s why we need more sensitization to the men and the youths”* (IDI,  
292 female, Nurse).

293 *“The perception of men (about contraceptives) is lower than that of women. The*  
294 *women know the implications better than the men. The men in the rural areas don’t*

## SOCIOCULTURAL CONTEXT AND INNOVATION SCALE UP

295 *mind having any number of children...”* (FGD, married men)

296 Also, a female health worker emphasised the importance of male involvement particularly in  
297 communities where the literacy rate is low:

298 *“Honestly, we need to do more in carrying them [men] along. Male involvement is*  
299 *very important because you know they are our superiors. We in the North, it is only*  
300 *the educated that may be sometimes at loggerhead (with their husbands)... but these*  
301 *illiterates and native people, it is always the man that is superior. So, it is very*  
302 *important for us to consider male involvement, it will help a lot* (IDI, female, Nurse).

### 303 **3.5 Community support for scale up**

304 The traditional leaders interviewed believed that community support for the innovation is  
305 very high.

306 *“In fact, the support our community gives to this programme, without exaggeration, I*  
307 *will say maybe 80-90%. They (the community) have been very supportive of the*  
308 *programme”* (IDI, male, Traditional ruler, Yemaltu-Deba).

309 *“Definitely, you have 70% support from the communities. From the religious leaders,*  
310 *traditional rulers and even of ward heads in the community we get 100% support”*  
311 (IDI, male, Traditional leader, Gombe).

312 However, some cautioned that the community support is not as high as expected due to what  
313 they call low knowledge and awareness about contraceptive choices in Northern Nigeria.

314 *“...Really, people have supported the program but I know some people do not have*  
315 *the knowledge (about injectable contraceptives) but those that have the knowledge*  
316 *are really in support of the program... [you know] the Northern culture prohibits*  
317 *some things, that’s why I said the support for it (injectable contraceptives scale up) is*  
318 *not as much as we expect.”* (IDI, male, Christian religious leader)

319 One community leader described his role as active in the scale up process because he helps in  
320 disseminating information to all the wards under his domain. He shared his experience:

321 *“Whenever the need arises, we normally call the kingmakers, district head*  
322 *kingmakers, they are about seven, and we have at least 54 ward heads, we use to call them from ti*

323 Many of the leaders ascribed the progress with the scale up in their communities to the

## SOCIOCULTURAL CONTEXT AND INNOVATION SCALE UP

324 involvement of the traditional leaders in the programme. However, some leaders complained  
325 of not being officially involved in the programme, although they still offer their support.

326 *“There are so many traditional rulers that were involved in this program; that is the*  
327 *reason why it has been accepted 100%, especially in Gombe State now”* (IDI, male,  
328 Traditional leader, Gombe).

329 *“...My involvement is...passive involvement. Of course, we preachers, you can push*  
330 *people, encourage them in your own little way... We preach it, we tell people about*  
331 *it... (IDI, male, Christian religious leader)*

332

### 333 **4. Discussion**

334 In our study, there were a number of sociocultural issues alluded to as factors that may affect  
335 scale up of a contraceptive innovation in Nigeria, including patriarchy, traditional and  
336 religious norms, beliefs and myths about contraceptives and family planning. Agunbiade &  
337 Ogunleye<sup>27</sup> reported in their study assessing the sociocultural barriers to the scale up of  
338 exclusive breastfeeding in Nigeria, the scale up process cannot be separated from the context  
339 and the culture in the environment. Further, in a study among African American women,  
340 culture and health beliefs were found to be significant predictors of health innovation  
341 uptake.<sup>28</sup>

342 Our study indicates it is vital to secure the understanding and support of the men and  
343 significant others for scale up of the community-based distribution of injectable  
344 contraceptives to succeed in environments like our study site that are still largely  
345 patriarchal.<sup>27</sup> Similar to the findings of our study, male involvement and support of women’s  
346 significant others, particularly the mothers-in-law, have been reported to be crucial to  
347 innovation scale up in Nigeria as these significant others have strong influence on choices  
348 made by women.<sup>27</sup> In other settings, increased male participation through increasing men’s  
349 knowledge and reducing their opposition has been shown to improve uptake and continued  
350 use of contraceptives<sup>29-31</sup> and enhancement of prevention of mother to child transmission of  
351 HIV (PMTCT) scale up processes.<sup>32</sup> In this study, one of the reasons why women reportedly  
352 use contraceptives was to look attractive and satisfy their husbands in order to prevent them  
353 from engaging in extramarital relationships. Thus, contraception is both liberating for women  
354 on one hand but also perhaps serving the very patriarchy they are trapped in on the other.

## SOCIOCULTURAL CONTEXT AND INNOVATION SCALE UP

355 Studies have shown that in many African societies, patriarchy is perpetuated by the  
356 socialisation process which starts from the family and is often preserved by women  
357 themselves.<sup>33,34</sup>

358 Also, findings from our study show passive resistance to contraceptive uptake, particularly at  
359 the individual levels. Research has shown that passive resistance is one of the major reasons  
360 for the high failure rate of innovation scale up.<sup>35,36</sup> Passive resistance often results from  
361 individuals' resistance to change and contentment with or lack of power to change the status  
362 quo.<sup>36</sup> Further, consumers will not adopt an innovation if they are not sure of its value or  
363 benefits.<sup>37</sup> According to Heidenreich and Kraemer, passive innovation resistance should be  
364 addressed before the introduction of new innovations into the society.<sup>35</sup> Strategies for  
365 reducing passive resistance to uptake of health innovations in the community include actively  
366 involving men in their uptake,<sup>14</sup> as well as giving adequate and correct information about the  
367 advantages of contraceptive use to all stakeholders - health workers, community and religious  
368 leaders, trained volunteers and program managers.<sup>37</sup>

369 Since the passive resistance reported in this study is largely underpinned by deep-seated  
370 issues of patriarchy, religious beliefs and traditional norms/values, it is imperative for policy  
371 makers and program managers to engage men – who are custodians, in most cases, of both  
372 religious and cultural values.<sup>38,39</sup> Male involvement can bring benefits for all community  
373 stakeholders,<sup>38</sup> as well as social change.<sup>40</sup> With careful management and ongoing monitoring,  
374 the involvement of men may ultimately give the scale up of this health innovation a greater  
375 chance of success.

376 Furthermore, religious beliefs were also found to influence scale up of the community-based  
377 injectable contraceptives and family planning in general in our study sites in Northern  
378 Nigeria. Religion has been shown to significantly influence decisions on contraceptive use,<sup>41</sup>  
379 as well as individual/household choices, lifestyle and even traditional values.<sup>42</sup> Thus,  
380 religion has great implications for the social marketing of commodities particularly  
381 contraceptives, as uptake of health products has been shown to differ significantly among  
382 adherents of major religions.<sup>42</sup> For example, research done in Islamic countries<sup>43,44</sup> highlights  
383 the need to understand Islamic religion in order to do effective social marketing, and  
384 recommends that approval be obtained from religious leadership before certain sensitive  
385 products like contraceptives are marketed. Understanding religious nuances in local contexts  
386 is important in multi-faith countries such as Nigeria – for example, what 'works' in the

## SOCIOCULTURAL CONTEXT AND INNOVATION SCALE UP

387 largely-Islamic North<sup>45</sup> may need adaptation for Christian populations elsewhere.

388 Our study demonstrated the importance of strong community support and partnership with  
389 community gate-keepers in the scale up process. Research has shown that the CBD approach  
390 cannot succeed without community participation.<sup>46</sup> Therefore, programme implementers need  
391 to learn from the community what works (or may work) in the setting, what distribution  
392 method the community prefers or what modification to the existing methods they favour.  
393 Research has shown that there is no quick fix to scaling up.<sup>46</sup> It is essentially a learning  
394 process which is unique in different contexts. Therefore, scale up may not be effective  
395 without adequate contextual knowledge and willingness to learn through the process of  
396 community participation and stakeholder collaboration.<sup>46 47</sup>

397 While the focus of this paper has been on challenges as identified in the wider context of  
398 religion and patriarchy, many of the suggested solutions rely on the health systems and those  
399 working in it, to navigate these challenges and overcome them. However, this cannot be a  
400 static or reactive approach but rather needs to recognise that health systems and those  
401 working in them are also part of the sociocultural context and therefore it is important to find  
402 ways to support healthcare workers in mediating, translating and promoting the innovation in  
403 this context.

### 404 ***4.1 Limitations of the study***

405 Some limitations of this study should be emphasised. As with any qualitative study, the  
406 findings are not statistically generalizable but the theories and ideas can be applied to other  
407 contexts. Thus, the findings of this study provide valuable information into how sociocultural  
408 context and user support affect the scale up of health innovations in LMICs, particularly in a  
409 patriarchal society like Nigeria.

### 410 ***4.2 Recommendations***

411 Further studies are needed on the barriers and facilitators to community-based distribution of  
412 health innovations.<sup>41</sup> Although the pilot project<sup>16</sup> provided some evidence that community-  
413 based distribution is feasible in Nigeria, more understanding about what may impede or  
414 enhance this approach to health commodity distribution is needed. In addition, incorporating  
415 the CBD approach with other outreach programmes, developing a more effective supervision  
416 of the approach may help make CBD more productive.

### 417 ***4.3 Conclusion***

## SOCIOCULTURAL CONTEXT AND INNOVATION SCALE UP

418 Our study revealed a number of sociocultural factors influencing the scale up of community-  
419 based distribution of injectable contraceptives in Nigeria. These include subtle resistance to  
420 innovation uptake as a result of deep-rooted cultural and religious beliefs about fertility and  
421 contraceptive use, influence of patriarchy and prominent role of traditional and religious  
422 leaders on innovation uptake. Findings also suggest the need for continuous community  
423 education and engagement with the significant others and community leadership structures –  
424 both traditional and religious. Thus, providing an innovation does not necessarily translate to  
425 uptake. Therefore, program implementers should also consider sociocultural and health  
426 system contexts when packaging a health innovation. Hence, supporting those in the health  
427 system to mediate the innovation in ways that are sensitive to the context but which, by  
428 working with communities and others, promotes transformation is imperative. Policy  
429 implementers should also see scale up as a learning process and be willing to move at the  
430 speed of the community.

### 431 **Acknowledgements**

432 We are grateful to Drs Mariya Saleh, Wole Adefalu, Edward Oladele and Hadiza Kamofu for  
433 expediting access to key informants. Also, we appreciate Dr Alex Eze for his feedback on the  
434 early draft of the manuscript. We are grateful for the support of Dr Busola Adebayo, Jimi  
435 Latunji and Wunmi Folajimi-Senjobi with editing the manuscript. We would like to thank all  
436 the participants in this study.

### 437 **Authors' contributions**

438 OA conceived the study; OA and MK designed it. The data was collected by OA. OA, MK  
439 and BH drafted and commented on the draft of the manuscript. OA, MK and BH read and  
440 approved the final version of the manuscript.

### 441 **Data Availability Statement**

442 Dataset for this study is available at <https://doi.org/10.5061/dryad.8kpr4xj4>.



## SOCIOCULTURAL CONTEXT AND INNOVATION SCALE UP

### 443 **References**

- 444 1. Subramanian S, Naimoli J, Matsubayashi T, et al. Do we have the right models for scaling  
445 up health services to achieve the Millennium Development Goals? *BMC health*  
446 *services research* 2011;11(1):336.
- 447 2. Manham L, Hanson K. Scaling up in international health: what are the key issues? Review.  
448 *Health Policy Plan* 2010;25:85-96.
- 449 3. Bradley EH, Curry LA, Taylor LA, et al. A model for scale up of family health innovations  
450 in low-income and middle-income settings: a mixed methods study. *BMJ open*  
451 2012;2(4):e000987.
- 452 4. Hecht R, Stover J, Bollinger L, et al. Financing of HIV/AIDS programme scale-up in low-  
453 income and middle-income countries, 2009–31. *The Lancet* 2010;376(9748):1254-60.
- 454 5. Johns B, Torres TT. Costs of scaling up health interventions: a systematic review. *Health*  
455 *policy and planning* 2005;20(1):1-13.
- 456 6. Mangham LJ, Hanson K. Scaling up in international health: what are the key issues?  
457 *Health policy and planning* 2010;25(2):85-96.
- 458 7. Rajaram SS, Rashidi A. Asian-Islamic women and breast cancer screening: a socio-cultural  
459 analysis. *Women & health* 1999;28(3):45-58.
- 460 8. Westercamp N, Bailey RC. Acceptability of Male Circumcision for Prevention of  
461 HIV/AIDS in Sub-Saharan Africa: A Review. *AIDS and Behavior* 2007;11(3):341-55.  
462 doi: 10.1007/s10461-006-9169-4
- 463 9. Katapodi MC, Lee KA, Facione NC, et al. Predictors of perceived breast cancer risk and  
464 the relation between perceived risk and breast cancer screening: a meta-analytic  
465 review. *Preventive medicine* 2004;38(4):388-402.
- 466 10. Muanda M, Ndongo PG, Taub LD, et al. Barriers to modern contraceptive use in  
467 Kinshasa, DRC. *PloS one* 2016;11(12):e0167560.
- 468 11. Muanda MF, Ndongo GP, Messina LJ, et al. Barriers to modern contraceptive use in rural  
469 areas in DRC. *Culture, health & sexuality* 2017;19(9):1011-23.
- 470 12. Airhihenbuwa CO. Health and culture: Beyond the Western paradigm: Sage 1995.
- 471 13. Colleran H, Mace R. Social network-and community-level influences on contraceptive  
472 use: evidence from rural Poland. *Proc R Soc B* 2015;282(1807):20150398.
- 473 14. Dalaba MA, Stone AE, Krumholz AR, et al. A qualitative analysis of the effect of a  
474 community-based primary health care programme on reproductive preferences and  
475 contraceptive use among the Kassena-Nankana of northern Ghana. *BMC health*  
476 *services research* 2016;16(1):80.
- 477 15. Etukudo IW. Spousal approval, communication and contraceptive behaviour in rural  
478 Nigeria. *African Journal of Midwifery and Women's Health* 2015;9(4):170-76.
- 479 16. FHI. The Effectiveness of Community-Based Access to Injectable Contraceptives in  
480 Nigeria: A Technical Report. 2010
- 481 17. Association for Reproductive and Family Health. Increasing access to contraceptives in  
482 Nigeria through task-shifting to Community Health Extension Workers (CHEWs)  
483 Abuja: Association for Reproductive and Family Health; 2015 [cited 2015 6 January].  
484 Available from: <http://www.arfh-ng.org/news/item012.php> accessed 6 January 2015.
- 485 18. Association for Reproductive and Family Health. Increasing Access to Contraceptives in  
486 Nigeria Through Task-shifting to Community Health Extension Workers (CHEWS)  
487 Ibadan: Association for Reproductive and Family Health,; 2014 [cited 2015 5  
488 November]. Available from: [http://arfh-ng.org/increasing-access-contraceptives-](http://arfh-ng.org/increasing-access-contraceptives-nigeria-task-shifting-community-health-extension-workers-chews/)  
489 [nigeria-task-shifting-community-health-extension-workers-chews/](http://arfh-ng.org/increasing-access-contraceptives-nigeria-task-shifting-community-health-extension-workers-chews/) accessed 5  
490 November 2015.
- 491 19. National Population Commission. Population and housing census of the Federal Republic



## SOCIOCULTURAL CONTEXT AND INNOVATION SCALE UP

- 492 of Nigeria. *Priority tables* 2006;1
- 493 20. National Population Commission. Nigeria demographic and health survey 2008. *Nigeria*
- 494 *and ICF Macro* 2008
- 495 21. National Population Commission, ICF International. Nigeria Demographic and Health
- 496 Survey 2013. *Abuja, Nigeria* 2014
- 497 22. Vonk ME, Tripodi T, Epstein I. Research techniques for clinical social workers:
- 498 Columbia University Press 2007.
- 499 23. Pope C, Mays N. Qualitative research: reaching the parts other methods cannot reach: an
- 500 introduction to qualitative methods in health and health services research. *Bmj*
- 501 1995;311(6996):42-45.
- 502 24. Temple B, Edwards R. Interpreters/translators and cross-cultural research: Reflexivity
- 503 and border crossing. *International Journal of Qualitative Methods* 2002;1(2)
- 504 25. Hutchison AJ, Johnston LH, Breckon JD. Using QSR□NVivo to facilitate the
- 505 development of a grounded theory project: an account of a worked example.
- 506 *International journal of social research methodology* 2010;13(4):283-302.
- 507 26. O'Brien BC, Harris IB, Beckman TJ, et al. Standards for reporting qualitative research: a
- 508 synthesis of recommendations. *Academic Medicine* 2014;89(9):1245-51.
- 509 27. Agunbiade OM, Ogunleye OV. Constraints to exclusive breastfeeding practice among
- 510 breastfeeding mothers in Southwest Nigeria: implications for scaling up. *International*
- 511 *breastfeeding journal* 2012;7(1):5.
- 512 28. Sociocultural context of mammography screening use. *Oncology nursing forum*; 2006.
- 513 Oncology Nursing Society.
- 514 29. Kabagenyi A, Jennings L, Reid A, et al. Barriers to male involvement in contraceptive
- 515 uptake and reproductive health services: a qualitative study of men and women's
- 516 perceptions in two rural districts in Uganda. *Reproductive health* 2014;11(1):21.
- 517 30. Ujuju C, Anyanti J, Adebayo S, et al. Religion, culture and male involvement in the use
- 518 of the Standard Days Method: evidence from Enugu and Katsina states of Nigeria.
- 519 *International nursing review* 2011;58(4):484-90.
- 520 31. Sanusi AA, Akinyemi OO, Onoviran OO. Do knowledge and cultural perceptions of
- 521 modern female contraceptives predict male involvement in Ayete, Nigeria? *African*
- 522 *journal of reproductive health* 2014;18(4):105-14.
- 523 32. Peltzer K, Jones D, Weiss SM, et al. Promoting male involvement to improve PMTCT
- 524 uptake and reduce antenatal HIV infection: a cluster randomized controlled trial
- 525 protocol. *BMC Public Health* 2011;11(1):778. doi: 10.1186/1471-2458-11-778
- 526 33. Florence N. Bukusu (Kenya) folktales: how women perpetuate patriarchy. *International*
- 527 *Feminist Journal of Politics* 2013;15(3):370-90.
- 528 34. Kambarami M. Femininity, sexuality and culture: Patriarchy and female subordination in
- 529 Zimbabwe. *South Africa: ARSRC* 2006
- 530 35. Heidenreich S, Kraemer T. Innovations—doomed to fail? Investigating strategies to
- 531 overcome passive innovation resistance. *Journal of Product Innovation Management*
- 532 2016;33(3):277-97.
- 533 36. Heidenreich S, Spieth P. Why innovations fail—The case of passive and active
- 534 innovation resistance. *International Journal of Innovation Management*
- 535 2013;17(05):1350021.
- 536 37. KISS Communications. Why Consumers Resist Innovation – part one 2016 [cited 2018 1
- 537 September]. Available from: [https://www.kisscom.co.uk/news/why-consumers-resist-](https://www.kisscom.co.uk/news/why-consumers-resist-innovation-part-one)
- 538 [innovation-part-one](https://www.kisscom.co.uk/news/why-consumers-resist-innovation-part-one) accessed 1 September 2018.
- 539 38. Orji E, Onwudiegwu U. Contraceptive practice among married market men in Nigeria.
- 540 *East African medical journal* 2003;80(7):357-60.
- 541 39. Orji E, Onwudiegwu U. Contraceptive practice among married men in Nigeria. *East Afr*

## SOCIOCULTURAL CONTEXT AND INNOVATION SCALE UP

- 542 *Med J* 2008;200(80):7.
- 543 40. Onwukwe LC, Njemanze VC, Ebeh R, et al. Religiosity and Sexism as Indices of  
544 People's Perception of Women in Politics in Nigeria. *American Journal of Social*  
545 *Science Research* 2017;3(2):9-16.
- 546 41. Mitike G. Community-based distribution of family planning as perceived by people in the  
547 reproductive age group, North and South Gondar zones, Ethiopia. *Ethiopian Journal*  
548 *of Health Development* 2000;14(1):31-42.
- 549 42. Shyan Fam K, Waller DS, Zafer Erdogan B. The influence of religion on attitudes  
550 towards the advertising of controversial products. *European Journal of marketing*  
551 2004;38(5/6):537-55.
- 552 43. Michell P, Al-Mossawi M. Religious commitment related to message contentiousness.  
553 *International Journal of Advertising* 1999;18(4):427-43.
- 554 44. Luqmani M, Yavas U, Quraeshi Z. Advertising in Saudi Arabia: content and regulation.  
555 *International Marketing Review* 1989;6(1)
- 556 45. Watts MJ. Silent violence: Food, famine, and peasantry in northern Nigeria: University of  
557 Georgia Press 2013.
- 558 46. Gilson L, Schneider H. Commentary: Managing scaling up: what are the key issues?  
559 *Health Policy and Planning* 2010;25(2):97-98.
- 560 47. Phillips JF, Greene WL. Community based distribution of family planning in Africa:  
561 lessons from operations research. 1993

562

563

SOCIOCULTURAL CONTEXT AND INNOVATION SCALE UP

564 **Table and Figure**

565 **Table 1: Participants and data collection methods across study sites**

| <b>Location</b>                | <b>Type</b> | <b>n</b>  | <b>Participant type</b>                                                                                                         |
|--------------------------------|-------------|-----------|---------------------------------------------------------------------------------------------------------------------------------|
| <b>Federal and State Level</b> |             |           |                                                                                                                                 |
|                                | KII         | 4         | NGO program manager, Senior official at the Federal MoH <sup>a</sup> , NGO program managers                                     |
| <b>Gombe State</b>             |             |           |                                                                                                                                 |
|                                | KII         | 3         | Senior officials of State MoH.                                                                                                  |
|                                | IDI         | 7         | Health workers (Nurses, CHEWs <sup>b</sup> )                                                                                    |
| <b>LGA A</b>                   |             |           |                                                                                                                                 |
|                                | FGD         | 5         | Current contraceptive users, older women non-users, younger women non-users (in reproductive age group), married and single men |
| <b>LGA B</b>                   |             |           |                                                                                                                                 |
|                                | IDI         | 8         | Health workers (Nurses, CHEWs <sup>b</sup> )                                                                                    |
|                                | FGD         | 5         | Current contraceptive users, older women non-users, younger women non-users (in reproductive age group), married and single men |
| <b>Total</b>                   |             | <b>32</b> |                                                                                                                                 |

566 <sup>a</sup>MoH – Ministry of Health; <sup>b</sup>CHEWs – Community Health Extension Workers

567

568

## SOCIOCULTURAL CONTEXT AND INNOVATION SCALE UP

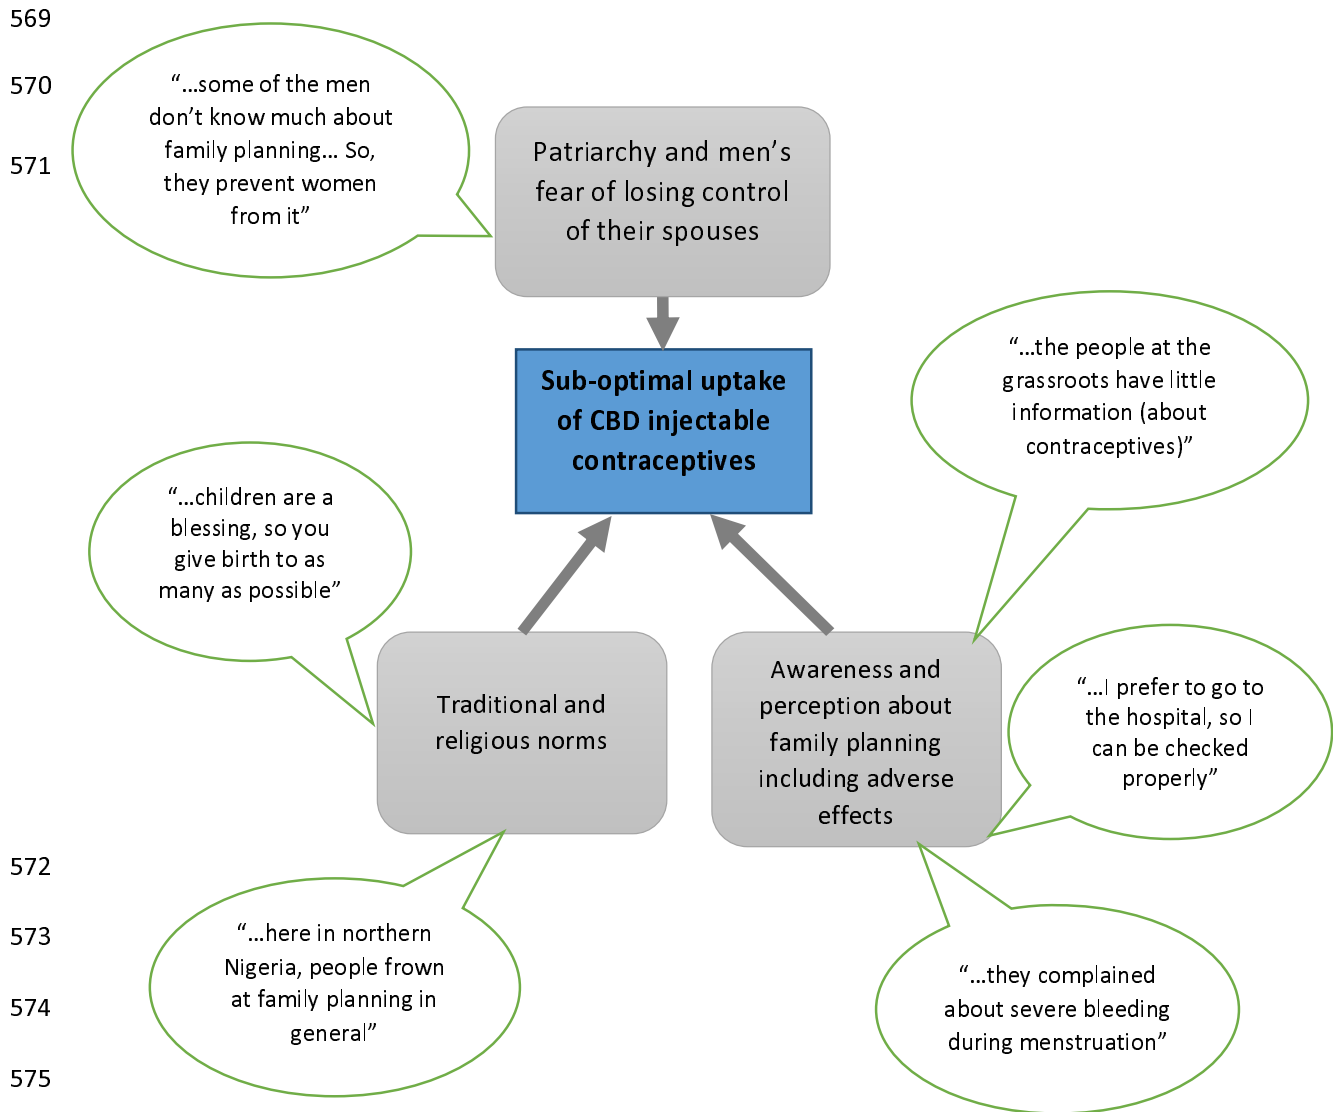

578 **Figure 1: Socio-cultural factors influencing uptake of CBD of injectable contraceptives**  
579 **in Gombe State**

580
